# Supplementary material for: Prevalence of Knee Osteoarthritis and Health-Related Quality of Life in Stroke Patients over 60 Years Old: A Cross-Sectional Study Using Korean National Health and Nutrition Examination Survey V
Source: PubMed Central journal article supplement — Ann Geriatr Med Res. 2021 Jul 16;25(3):178–86. doi: 10.4235/agmr.21.0053 (PMC8497948; doi:10.4235/agmr.21.0053), 2021-07-16
Supplement: agmr-21-0053-suppl1.pdf [file agmr-21-0053-suppl1.pdf]

## SUPPLEMENTARY MATERIAL

**Table S1.** Simple linear regression model for the health-related quality of life in the stroke group

| Variable                | Simple linear regression |       |        |         |
|-------------------------|--------------------------|-------|--------|---------|
|                         | B                        | SE    | t      | p-value |
| Osteoarthritis          |                          |       |        |         |
| No                      | Reference                | -     | -      |         |
| Yes                     | -0.167                   | 0.009 | -18.34 | <0.0001 |
| Sex                     |                          |       |        |         |
| Male                    | Reference                | -     | -      |         |
| Female                  | -0.030                   | 0.007 | -3.99  | <0.0001 |
| Age                     | -0.010                   | 0.001 | -19.35 | <0.0001 |
| Age group (y)           |                          |       |        |         |
| 60-69                   | Reference                | -     | -      |         |
| 70-79                   | -0.077                   | 0.008 | -9.44  | <0.0001 |
| ≥80                     | -0.150                   | 0.007 | -21.96 | <0.0001 |
| Income                  |                          |       |        |         |
| Low                     | Reference                | -     | -      |         |
| Middle-low              | 0.003                    | 0.009 | 0.32   | 0.752   |
| Middle-high             | 0.016                    | 0.009 | 1.78   | 0.077   |
| High                    | 0.120                    | 0.016 | 7.61   | <0.0001 |
| Education               |                          |       |        |         |
| ≤Middle school          | Reference                | -     | -      |         |
| ≥High school            | 0.125                    | 0.009 | 14.14  | <0.0001 |
| Obesity                 |                          |       |        |         |
| No                      | Reference                | -     | -      |         |
| Yes                     | 0.016                    | 0.016 | 1.02   | 0.311   |
| Alcohol intake per week |                          |       |        |         |
| No drinking             | Reference                | -     | -      |         |
| ≤1                      | 0.020                    | 0.012 | 1.7    | 0.090   |
| 2-3                     | 0.014                    | 0.011 | 1.23   | 0.220   |
| ≥4                      | 0.047                    | 0.004 | 11.76  | <0.0001 |
| Smoking status          |                          |       |        |         |
| No                      | Reference                | -     | -      |         |
| Yes                     | -0.053                   | 0.007 | -7.8   | <0.0001 |
| Aerobic exercise a week |                          |       |        |         |
| ≤2                      | Reference                | -     | -      |         |
| 3-4                     | 0.027                    | 0.009 | 3.11   | 0.002   |
| ≥5                      | 0.085                    | 0.007 | 11.46  | <0.0001 |
| Hypertension            |                          |       |        |         |
| No                      | Reference                | -     | -      |         |
| Yes                     | 0.003                    | 0.013 | 0.24   | 0.812   |
| Diabetes                |                          |       |        |         |
| No                      | Reference                | -     | -      |         |
| Yes                     | -0.037                   | 0.009 | -4.08  | <0.0001 |
| Cardiovascular disease  |                          |       |        |         |
| No                      | Reference                | -     | -      |         |
| Yes                     | -0.020                   | 0.007 | -2.97  | 0.003   |

B, estimate; SE, standard error.
