# Supplementary material for: Prevalence of Knee Osteoarthritis and Health-Related Quality of Life in Stroke Patients over 60 Years Old: A Cross-Sectional Study Using Korean National Health and Nutrition Examination Survey V
Source: PubMed Central journal article supplement — Ann Geriatr Med Res. 2021 Jul 16;25(3):178–86. doi: 10.4235/agmr.21.0053 (PMC8497948; doi:10.4235/agmr.21.0053), 2021-07-16
Supplement: agmr-21-0053-suppl2.pdf [file agmr-21-0053-suppl2.pdf]

**Table S2.** Comparison of the prevalence of knee osteoarthritis between the stroke and no-stroke groups

| Variable | Prevalence of knee osteoarthritis |              | p-value <sup>a)</sup> |
|----------|-----------------------------------|--------------|-----------------------|
|          | No-stroke group                   | Stroke group |                       |
| Total    | 1059 (19.8)                       | 65 (21.0)    | 0.668                 |
| 60–69 y  | 400 (14.5)                        | 23 (14.9)    |                       |
| 70–79 y  | 511 (24.2)                        | 29 (22.1)    |                       |
| ≥80 y    | 148 (31.9)                        | 13 (38.4)    |                       |

Values are presented as number (%).

<sup>a)</sup>Using the chi-square test.
